# Supplementary material
Source: PubMed Central journal article supplement (PMC4155061)
Supplement: NIHMS609241-supplement-2.pdf [file NIHMS609241-supplement-2.pdf]

|           |                  |            |             |
|-----------|------------------|------------|-------------|
| Tumor -5p | Gleason $\geq 7$ | Gleason 7  | 0.82        |
| Tumor -5p | Gleason $\geq 7$ | Gleason 7  | 0.414       |
| Tumor -5p | Gleason $\geq 7$ | Gleason 7  | 0           |
| Tumor -5p | Gleason $\geq 7$ | Gleason 7  | 0.002       |
| Tumor -5p | Gleason $> 7$    | Gleason 7  | 0.001       |
| Tumor -5p | Gleason $\geq 7$ | Gleason 7  | 0.021       |
| Tumor -5p | Gleason $\geq 7$ | Gleason 7  | 0.004       |
| Tumor -5p | Gleason $\geq 7$ | Gleason 7  | 0.143       |
| Tumor -5p | Gleason $\geq 7$ | Gleason 7  | 0.007       |
| Tumor -5p | Gleason $> 7$    | Gleason 7  | 0           |
| Tumor -5p | Gleason $\geq 7$ | Gleason 7  | 0           |
| Tumor -5p | Gleason $\geq 7$ | Gleason 7  | 0.021       |
| Tumor -5p | Gleason $\geq 7$ | Gleason 7  | 0           |
| Tumor -5p | Gleason $\geq 7$ | Gleason 7  | 0           |
| Tumor -5p | Gleason $> 7$    | Gleason 7  | 0           |
| Tumor -5p | Gleason $\geq 7$ | Gleason 7  | 0           |
| Tumor -5p | Gleason $\geq 7$ | Gleason 7  | 0           |
| Tumor -5p | Gleason $\geq 7$ | Gleason 7  | 0           |
| Tumor -5p | Gleason $\geq 7$ | Gleason 7  | 0           |
| Tumor -5p | Gleason $\geq 7$ | Gleason 8  | 0           |
| Tumor -5p | Gleason $\geq 7$ | Gleason 8  | 0.05        |
| Tumor -5p | Gleason $\geq 7$ | Gleason 8  | 0.035       |
| Tumor -5p | Gleason $\geq 7$ | Gleason 8  | 0           |
| Tumor -5p | Gleason $> 7$    | Gleason 8  | 0.218       |
| Tumor -5p | Gleason $\geq 7$ | Gleason 8  | <b>0.03</b> |
| Tumor -5p | Gleason $\geq 7$ | Gleason 8  | 0.014       |
| Tumor -5p | Gleason $\geq 7$ | Gleason 8  | 0.011       |
| Tumor -5p | Gleason $\geq 7$ | Gleason 8  | 0.702       |
| Tumor -5p | Gleason $> 7$    | Gleason 8  | 0.002       |
| Tumor -5p | Gleason $\geq 7$ | Gleason 8  | 0.008       |
| Tumor -5p | Gleason $\geq 7$ | Gleason 8  | 0.002       |
| Tumor -5p | Gleason $\geq 7$ | Gleason 8  | 0.018       |
| Tumor -5p | Gleason $\geq 7$ | Gleason 8  | 0           |
| Tumor -5p | Gleason $> 7$    | Gleason 8  | 0.001       |
| Tumor -5p | Gleason $\geq 7$ | Gleason 8  | 0.001       |
| Tumor -5p | Gleason $\geq 7$ | Gleason 8  | 0.058       |
| Tumor -5p | Gleason $\geq 7$ | Gleason 8  | 0.006       |
| Tumor -5p | Gleason $\geq 7$ | Gleason 8  | 0           |
| Tumor -5p | Gleason $\geq 7$ | Gleason 8  | 0.002       |
| Tumor -5p | Gleason $\geq 7$ | Gleason 8  | 0           |
| Tumor -5p | Gleason $\geq 7$ | Gleason 8  | 0.002       |
| Tumor -5p | Gleason $\geq 7$ | Gleason 8  | 0           |
| Tumor -5p | Gleason $> 7$    | Gleason 8  | 0.074       |
| Tumor -5p | Gleason $\geq 7$ | Gleason 8  | 0.008       |
| Tumor -5p | Gleason $\geq 7$ | Gleason 8  | 0           |
| Tumor -5p | Gleason $\geq 7$ | Gleason 8  | 0.058       |
| Tumor -5p | Gleason $\geq 7$ | Gleason 8  | 0           |
| Tumor -5p | Gleason $> 7$    | Gleason 8  | 0           |
| Tumor -5p | Gleason $\geq 7$ | Gleason 8  | 0           |
| Tumor -5p | Gleason $\geq 7$ | Gleason 8  | 0           |
| Tumor -5p | Gleason $\geq 7$ | Gleason 8  | 0           |
| Tumor -5p | Gleason $> 7$    | Gleason 8  | 0           |
| Tumor -5p | Gleason $\geq 7$ | Gleason 8  | 0           |
| Tumor -5p | Gleason $\geq 7$ | Gleason 10 | 0.029       |

|           |                  |            |       |
|-----------|------------------|------------|-------|
| Tumor -5p | Gleason $\geq 7$ | Gleason 10 | 0.009 |
| Tumor -5p | Gleason $\geq 7$ | Gleason 10 | 0.002 |
| Tumor -5p | Gleason $\geq 7$ | Gleason 10 | 0.224 |
| Tumor -5p | Gleason $\geq 7$ | Gleason 10 | 0     |
| Tumor -5p | Gleason $\geq 7$ | Gleason 10 | 0     |
