# Supplementary material
Source: PubMed Central journal article supplement (PMC4155061)
Supplement: NIHMS609241-supplement-3.pdf [file NIHMS609241-supplement-3.pdf]

| microRNA names | Ct values          |                    |
|----------------|--------------------|--------------------|
|                | ARCaP <sub>E</sub> | ARCaP <sub>M</sub> |
| h-miR-517*     | 23.38              | 40                 |
| h-miR-516-5p   | 24.45              | 40                 |
| h-miR-512-5p   | 25.29              | 40                 |
| h-miR-346      | 25.33              | 40                 |
| h-miR-514      | 26.02              | 40                 |
| h-miR-224      | 21.9               | 40                 |
| h-miR-513      | 20.97              | 40                 |
| h-miR-488      | 20.78              | 40                 |
| h-miR-326      | 23.45              | 37.63              |
| h-miR-515-3p   | 29.11              | 40                 |
| h-miR-451      | 30.72              | 40                 |
| h-miR-34b      | 25.68              | 40                 |
| h-miR-512-3p   | 27.3               | 40                 |
| h-miR-302b     | 27.63              | 40                 |
| h-miR-215      | 27.75              | 40                 |
| h-miR-506      | 28.13              | 40                 |
| h-miR-510      | 27.24              | 40                 |
| h-miR-202*     | 26.81              | 40                 |
| h-miR-516-3p   | 29.06              | 40                 |
| h-miR-492      | 29.16              | 40                 |
| h-miR-337      | 29.57              | 40                 |
| h-miR-508      | 28.6               | 40                 |
| h-miR-302c     | 28.64              | 40                 |
| h-miR-302a*    | 32.51              | 28.74              |
| hm-miR-1       | 31.78              | 30.14              |
| hm-miR-133b    | 29.92              | 28.28              |
| h-miR-485-3p   | 30.67              | 34.04              |
| h-miR-299-3p   | 31.22              | 33.68              |
| hr-miR-137     | 33.04              | 33.88              |
| h-miR-483      | 24.6               | 29.55              |
| h-miR-10b      | 28.26              | 31.06              |
| h-miR-329      | 24.23              | 33.61              |
| h-miR-489      | 25.9               | 26.91              |
| hmr-miR-133a   | 26.92              | 25.53              |
| hmr-miR-135b   | 22.83              | 23.29              |
| h-miR-155      | 27.08              | 24.76              |
| h-miR-31       | 17.82              | 24.44              |
| hmr-miR-146a   | 21.65              | 19.08              |
| h-miR-517c     | 40                 | 40                 |
| h-miR-520a*    | 40                 | 40                 |
| hmr-miR-128b   | 40                 | 40                 |
| hmr-miR-122a   | 40                 | 40                 |

|                |    |    |
|----------------|----|----|
| hmr-miR-136    | 40 | 40 |
| hmr-miR-138    | 40 | 40 |
| hmr-miR-142-5p | 40 | 40 |
| hmr-miR-143    | 40 | 40 |
| hmr-miR-144    | 40 | 40 |
| hmr-miR-145    | 40 | 40 |
| hmr-miR-154    | 40 | 40 |
| hmr-miR-190    | 40 | 40 |
| hmr-miR-199a   | 40 | 40 |
| hmr-miR-206    | 40 | 40 |
| hmr-miR-208    | 40 | 40 |
| hmr-miR-216    | 40 | 40 |
| hmr-miR-218    | 40 | 40 |
| hmr-miR-323    | 40 | 40 |
| hmr-miR-338    | 40 | 40 |
| hmr-miR-34c    | 40 | 40 |
| hmr-miR-433    | 40 | 40 |
| hmr-miR-448    | 40 | 40 |
| hmr-miR-98     | 40 | 40 |
| hm-miR-189     | 40 | 40 |
| hm-miR-199a*   | 40 | 40 |
| hm-miR-301     | 40 | 40 |
| hm-miR-302a    | 40 | 40 |
| hm-miR-361     | 40 | 40 |
| hm-miR-375     | 40 | 40 |
| hm-miR-377     | 40 | 40 |
| hm-miR-378     | 40 | 40 |
| hm-miR-380-5p  | 40 | 40 |
| hm-miR-381     | 40 | 40 |
| hm-miR-382     | 40 | 40 |
| hm-miR-412     | 40 | 40 |
| hm-miR-425     | 40 | 40 |
| hm-miR-450     | 40 | 40 |
| hm-miR-452     | 40 | 40 |
| hm-miR-484     | 40 | 40 |
| hm-miR-485-5p  | 40 | 40 |
| hm-miR-486     | 40 | 40 |
| hm-miR-7       | 40 | 40 |
| hr-miR-124a    | 40 | 40 |
| hr-miR-127     | 40 | 40 |
| hr-miR-142-3p  | 40 | 40 |
| hr-miR-153     | 40 | 40 |
| hr-miR-431     | 40 | 40 |
| h-miR-UL112-1  | 40 | 40 |

|                 |    |       |
|-----------------|----|-------|
| h-miR-UL148D-1  | 40 | 40    |
| h-miR-UL22A-1*  | 40 | 40    |
| h-miR-UL36-1    | 40 | 40    |
| h-miR-US25-1    | 40 | 40    |
| h-miR-US25-2-3p | 40 | 40    |
| h-miR-US25-2-5p | 40 | 40    |
| h-miR-US33-1    | 40 | 40    |
| h-miR-US5-1     | 40 | 40    |
| h-miR-US5-2     | 40 | 40    |
| h-miR-105       | 40 | 40    |
| h-miR-147       | 40 | 40    |
| h-miR-18b       | 40 | 40    |
| h-miR-198       | 40 | 40    |
| h-miR-202       | 40 | 40    |
| h-miR-220       | 40 | 40    |
| h-miR-302b*     | 40 | 40    |
| h-miR-302c*     | 40 | 40    |
| h-miR-302d      | 40 | 40    |
| h-miR-325       | 40 | 40    |
| h-miR-368       | 40 | 40    |
| h-miR-369-3p    | 40 | 40    |
| h-miR-369-5p    | 40 | 40    |
| h-miR-370       | 40 | 40    |
| h-miR-371       | 40 | 40    |
| h-miR-372       | 40 | 40    |
| h-miR-373*      | 40 | 40    |
| h-miR-376a      | 40 | 40    |
| h-miR-376b      | 40 | 40    |
| h-miR-380-3p    | 40 | 40    |
| h-miR-383       | 40 | 40    |
| h-miR-384       | 40 | 40    |
| h-miR-409-5p    | 40 | 25.02 |
| h-miR-410       | 40 | 40    |
| h-miR-453       | 40 | 40    |
| h-miR-490       | 40 | 40    |
| h-miR-493       | 40 | 40    |
| h-miR-496       | 40 | 40    |
| h-miR-498       | 40 | 40    |
| h-miR-499       | 40 | 40    |
| h-miR-503       | 40 | 40    |
| h-miR-509       | 40 | 40    |
| h-miR-515-5p    | 40 | 40    |
| h-miR-518a      | 40 | 40    |
| h-miR-518b      | 40 | 40    |

|                |       |       |
|----------------|-------|-------|
| h-miR-518c     | 40    | 40    |
| h-miR-518c*    | 40    | 40    |
| h-miR-518d     | 40    | 40    |
| h-miR-518e     | 40    | 40    |
| h-miR-518f     | 40    | 40    |
| h-miR-518f*    | 40    | 40    |
| h-miR-519b     | 40    | 40    |
| h-miR-519c     | 40    | 40    |
| h-miR-519d     | 40    | 40    |
| h-miR-519e     | 40    | 40    |
| h-miR-519e*    | 40    | 40    |
| h-miR-520a     | 40    | 40    |
| h-miR-520b     | 40    | 40    |
| h-miR-520c     | 40    | 40    |
| h-miR-520d     | 40    | 40    |
| h-miR-520d*    | 40    | 40    |
| h-miR-520e     | 40    | 40    |
| h-miR-520g     | 40    | 40    |
| h-miR-520h     | 40    | 40    |
| h-miR-521      | 40    | 40    |
| h-miR-522      | 40    | 40    |
| h-miR-523      | 40    | 40    |
| h-miR-524      | 40    | 40    |
| h-miR-524*     | 40    | 40    |
| h-miR-525      | 40    | 40    |
| h-miR-525*     | 40    | 40    |
| h-miR-526a     | 40    | 40    |
| h-miR-526b     | 40    | 40    |
| h-miR-526b*    | 40    | 40    |
| h-miR-526c     | 40    | 40    |
| h-miR-527      | 40    | 40    |
| h-miR-95       | 40    | 40    |
| h-miR-494      | 40    | 36.35 |
| h-miR-432      | 36.5  | 40    |
| hmr-miR-30e-5p | 35.89 | 39.02 |
| h-miR-517a     | 40    | 40    |
| hmr-miR-328    | 40    | 40    |
| hmr-miR-101    | 39.99 | 40    |
| hm-miR-9*      | 40    | 40    |
| h-miR-511      | 40    | 40    |
| hmr-miR-130a   | 40    | 40    |
| hr-miR-204     | 40    | 40    |
| hmr-miR-219    | 40    | 40    |
| h-miR-330      | 31.35 | 40    |

|                |       |       |
|----------------|-------|-------|
| h-miR-217      | 30.45 | 40    |
| hmr-miR-213    | 31.18 | 37.73 |
| h-miR-507      | 33.89 | 40    |
| hmr-miR-33     | 33.5  | 40    |
| h-miR-495      | 34.47 | 40    |
| h-miR-432*     | 32.51 | 40    |
| h-miR-211      | 32.86 | 40    |
| h-miR-363      | 32.15 | 40    |
| h-miR-129      | 33.88 | 40    |
| h-miR-UL22A-1  | 34.73 | 40    |
| hmr-miR-299-5p | 35.5  | 32.64 |
| hmr-miR-128a   | 36.26 | 33.3  |
| hr-miR-134     | 37.49 | 31.13 |
| h-miR-379      | 40    | 32.5  |
| h-miR-154*     | 40    | 32.34 |
| h-miR-487      | 40    | 32.94 |
| h-miR-519a     | 40    | 33.94 |
| h-miR-409-3p   | 40    | 23.65 |
| h-miR-367      | 40    | 30.31 |
| hmr-miR-296    | 40    | 40    |
| hmr-miR-141    | 36.42 | 40    |
| h-miR-497      | 40    | 36.5  |
| hr-miR-187     | 40    | 40    |
| h-miR-429      | 40    | 40    |
| h-miR-452*     | 40    | 40    |
| h-miR-504      | 40    | 40    |
| h-miR-373      | 40    | 40    |
| hm-miR-148a    | 40    | 40    |
| h-miR-422a     | 40    | 29.74 |
| hmr-miR-185    | 40    | 31.4  |
| hmr-miR-214    | 37.38 | 32.89 |
| h-miR-455      | 40    | 29.9  |
| h-miR-424      | 40    | 29.48 |
| h-miR-502      | 40    | 31.35 |
| h-miR-517b     | 40    | 34.47 |
| h-miR-374      | 40    | 35.14 |
| hmr-miR-184    | 40    | 32.96 |
| h-miR-96       | 31.13 | 33.19 |
| h-miR-199b     | 31.84 | 34.36 |
| hmr-miR-32     | 32.57 | 32.9  |
| hmr-miR-205    | 32.86 | 31.82 |
| h-miR-520f     | 33.04 | 34.83 |
| hmr-miR-223    | 34.46 | 34.59 |
| h-miR-518a-2*  | 33.9  | 33.67 |

|                |       |       |
|----------------|-------|-------|
| hmr-miR-126    | 36.76 | 34.73 |
| h-miR-106a     | 31.62 | 34.62 |
| hr-miR-9       | 34.49 | 35.06 |
| h-miR-30e-3p   | 32.36 | 32.83 |
| hmr-miR-148b   | 32.4  | 33.19 |
| hmr-miR-340    | 32.06 | 31.79 |
| hr-miR-140     | 30.9  | 32.46 |
| hmr-miR-196a   | 32    | 31.28 |
| hmr-miR-26a    | 31.76 | 32.04 |
| hmr-miR-449    | 32.81 | 31.69 |
| h-miR-505      | 31.27 | 40    |
| h-miR-491      | 34.02 | 40    |
| hm-miR-188     | 33.04 | 40    |
| hmr-miR-22     | 31.85 | 40    |
| hmr-miR-34a    | 28.18 | 28.63 |
| hmr-miR-195    | 28.44 | 28.76 |
| hmr-miR-200a   | 30.71 | 29.38 |
| hmr-miR-200b   | 28    | 26.29 |
| hmr-miR-342    | 33.44 | 31.33 |
| hmr-miR-200c   | 28.57 | 30.85 |
| hr-miR-99a     | 29.47 | 34.65 |
| h-miR-146b     | 28.45 | 34.2  |
| hmr-miR-324-3p | 27.79 | 32.16 |
| h-miR-20b      | 40    | 26.55 |
| h-miR-345      | 40    | 26.22 |
| h-miR-500      | 40    | 28.22 |
| h-miR-501      | 40    | 29.58 |
| hmr-miR-150    | 26.62 | 31.55 |
| hmr-miR-194    | 27.07 | 31.29 |
| hmr-miR-10a    | 27.01 | 29.02 |
| hmr-miR-152    | 29.65 | 30.53 |
| hmr-miR-139    | 29.46 | 30.11 |
| h-miR-18a*     | 29.19 | 30.8  |
| hmr-miR-29c    | 31.62 | 31.25 |
| hmr-miR-28     | 30.63 | 31.42 |
| hmr-miR-335    | 31.42 | 32.25 |
| hr-miR-203     | 31.26 | 30.33 |
| h-miR-191*     | 28.96 | 30.39 |
| hmr-miR-331    | 28.32 | 29.41 |
| hmr-miR-365    | 29.06 | 28.92 |
| hmr-miR-126*   | 29.42 | 29.24 |
| hmr-miR-100    | 29.69 | 21.51 |
| hmr-miR-18a    | 26.02 | 27.57 |
| hmr-miR-196b   | 26.05 | 27.62 |

|                |       |       |
|----------------|-------|-------|
| h-miR-362      | 25.36 | 27.36 |
| hm-miR-149     | 25.88 | 26.45 |
| h-miR-17-3p    | 25.13 | 26.62 |
| hmr-miR-27b    | 26.93 | 27.62 |
| hmr-miR-183    | 26.9  | 27.48 |
| h-miR-151      | 27.39 | 27.32 |
| h-miR-182*     | 25.93 | 28.97 |
| hr-miR-192     | 25.1  | 28.6  |
| hmr-miR-26b    | 26.76 | 26.43 |
| hmr-miR-186    | 26.71 | 26.62 |
| hr-miR-324-5p  | 26.35 | 27.44 |
| hm-miR-182     | 26.02 | 25.99 |
| hm-miR-15a     | 25.43 | 25.97 |
| hmr-miR-29a    | 25.15 | 24.74 |
| hmr-miR-181c   | 25.55 | 25.67 |
| hmr-miR-135a   | 24.9  | 26.05 |
| hmr-miR-212    | 25.99 | 26.51 |
| hmr-miR-24     | 26.56 | 26.69 |
| h-miR-200a*    | 21.3  | 30.11 |
| h-miR-422b     | 21.49 | 25.98 |
| hmr-miR-99b    | 24.06 | 23.8  |
| h-miR-423      | 24.53 | 24.03 |
| hmr-miR-30b    | 23.96 | 22.43 |
| hmr-miR-30a-5p | 24.77 | 23.6  |
| hmr-miR-339    | 22.94 | 23.62 |
| hmr-miR-106b   | 22.43 | 23.12 |
| hmr-miR-15b    | 23.06 | 23    |
| hmr-let-7d     | 22.85 | 23.16 |
| hmr-miR-23b    | 23.95 | 24.63 |
| hmr-miR-130b   | 24.04 | 24.55 |
| hm-let-7g      | 24.45 | 24.98 |
| hmr-miR-17-5p  | 24.92 | 24.94 |
| hr-let-7f      | 25.03 | 25.06 |
| hmr-miR-107    | 24.75 | 25.5  |
| h-miR-193b     | 24.39 | 25.77 |
| h-miR-197      | 23.35 | 23.37 |
| hmr-let-7b     | 23.61 | 22.73 |
| hmr-let-7c     | 24.15 | 25.33 |
| hmr-miR-181b   | 23.35 | 22.94 |
| hmr-miR-132    | 23.29 | 23.65 |
| hmr-miR-23a    | 22.24 | 22.33 |
| hmr-miR-29b    | 21.79 | 22.53 |
| hmr-miR-193a   | 24.22 | 24.28 |
| hmr-miR-30a-3p | 23.57 | 23.91 |

|              |       |       |
|--------------|-------|-------|
| hmr-miR-27a  | 23.34 | 22.75 |
| hmr-miR-181a | 21.52 | 21.94 |
| hmr-let-7i   | 21.42 | 21.52 |
| hmr-miR-19b  | 21.45 | 22.55 |
| hmr-miR-21   | 21.07 | 21.25 |
| h-miR-181d   | 20.83 | 21.2  |
| hmr-let-7e   | 21.97 | 22.01 |
| hr-let-7a    | 22.09 | 22.17 |
| hmr-miR-320  | 21.85 | 20.87 |
| 18s          | 20.85 | 22.99 |
| hmr-miR-191  | 19.59 | 20.35 |
| hmr-miR-125b | 21.04 | 20.01 |
| hmr-miR-19a  | 19.78 | 21.24 |
| hmr-miR-20a  | 20.77 | 21.58 |
| hr-miR-221   | 21.31 | 20.34 |
| hmr-miR-30c  | 20.96 | 20.02 |
| h-miR-93     | 21.68 | 22.68 |
| hmr-miR-103  | 21.5  | 22.23 |
| hmr-miR-30d  | 22.31 | 21.58 |
| hmr-miR-210  | 22.59 | 21.77 |
| hmr-miR-25   | 20.37 | 20.91 |
| hmr-miR-125a | 21.15 | 21.27 |
| hmr-miR-16   | 20.48 | 20.36 |
| hmr-miR-222  | 17.91 | 17.18 |
| hmr-miR-92   | 18.37 | 18.69 |
